# Supplementary material for: Unravelling the genetic basis of simplex Retinitis Pigmentosa cases
Source: PubMed Central journal article supplement (PMC5291209; doi:10.1038/srep41937), 2017-02-03
Supplement: srep41937-s1.pdf [file srep41937-s1.pdf]

## SUPPLEMENTARY INFORMATION

# Unravelling the genetic basis of simplex Retinitis

## Pigmentosa cases

Nereida Bravo-Gil<sup>1,2#</sup>, María González-del Pozo<sup>1,2#</sup>, Marta Martín-Sánchez<sup>1</sup>, Cristina Méndez-Vidal<sup>1,2</sup>, Enrique Rodríguez-de la Rúa<sup>3,4</sup>, Salud Borrego<sup>1,2</sup> and Guillermo Antiñolo<sup>1,2\*</sup>

---

<sup>1</sup> Department of Genetics, Reproduction and Fetal Medicine, Institute of Biomedicine of Seville, University Hospital Virgen del Rocío/CSIC/University of Seville, Seville, Spain.

<sup>2</sup> Centre for Biomedical Network Research on Rare Diseases (CIBERER), Seville, Spain.

<sup>3</sup> Department of Ophthalmology, University Hospitals Virgen Macarena and Virgen del Rocío, Seville, Spain.

<sup>4</sup> Retics Patología Ocular. OFTARED. Instituto Salud Carlos III.

---

# These authors contributed equally to this work.

\*Corresponding author:

**Guillermo Antiñolo, MD, PhD**

Department of Genetics, Reproduction and Fetal Medicine

University Hospital Virgen del Rocío

Av. Manuel Siurot s/n

41013, Seville. Spain

E-mail: [guillermo.antinolo.sspa@juntadeandalucia.es](mailto:guillermo.antinolo.sspa@juntadeandalucia.es)

**Manuscript # SREP-16-24192: Unravelling the genetic basis of simplex Retinitis Pigmentosa cases**

Nereida Bravo-Gil, María González-del Pozo, Marta Martín-Sánchez, Cristina Méndez-Vidal, Enrique Rodríguez-de la Rúa, Salud Borrego and Guillermo Antifólo.

**Supplementary Table S1: Clinical findings in solved cases initially diagnosed of sRP.** ad: Autosomal dominant; CRD: Cone rod Dystrophy; F: Female; LCA: Leber Congenital Amaurosis; M: Male; NA: Not available; RP: Retinitis Pigmentosa; RPE: Retinal pigment epithelium; STGD: Stargardt disease; xl: X-Linked.

| ID Number | Sex | Age of onset | First visual symptom             | Age at time of diagnosis | Symptoms                                                                           | BCVA                | Fundus                                                                                                                          | ERG                                         | Additional findings                                                      | Clinical reassessment |
|-----------|-----|--------------|----------------------------------|--------------------------|------------------------------------------------------------------------------------|---------------------|---------------------------------------------------------------------------------------------------------------------------------|---------------------------------------------|--------------------------------------------------------------------------|-----------------------|
| 2         | F   | 30           | Constriction of the visual field | 35                       | Reduced visual field, night blindness, decreased visual acuity                     | 0.2/0.3             | Bone spicule pigmentation, pallor of the optic disc, narrowed vessels                                                           | NA                                          | NA                                                                       | RP                    |
| 4         | F   | 8            | Decreased visual acuity          | 46                       | Central scotoma, night blindness, discromatopsy                                    | Light perception    | Pigment deposits in macula                                                                                                      | NA                                          | NA                                                                       | STGD                  |
| 10        | F   | 10           | Hemeralopy                       | 14                       | Reduced visual field, night blindness, decreased visual acuity                     | <0.1/<0.1           | Bone spicule pigmentation. Narrowed vessels. Macular atrophy.                                                                   | Abolished                                   | Farnsworth Test: not recordable (OD) and discromatopsy (OS)              | RP                    |
| 11        | M   | 2            | Hemeralopy                       | 11                       | Reduced visual field, night blindness, photophobia                                 | NA                  | NA                                                                                                                              | NA                                          | NA                                                                       | Choroideremia         |
| 12        | F   | Birth        | Hemeralopy                       | < 1                      | Reduced visual field, night blindness, decreased visual acuity                     | NA                  | NA                                                                                                                              | NA                                          | Nystagmus                                                                | LCA                   |
| 14        | F   | 4            | Hemeralopy                       | 4                        | Reduced visual field, night blindness, decreased visual acuity                     | 0.1/0.05            | NA                                                                                                                              | NA                                          | NA                                                                       | RP                    |
| 15        | F   | 5            | Hemeralopy                       | 16                       | Night blindness, decreased visual acuity, reduced visual field, photophobia        | NA                  | NA                                                                                                                              | Abolished                                   | NA                                                                       | RP                    |
| 17        | M   | 11           | Constriction of the visual field | 25                       | Night blindness, decreased visual acuity, reduced visual field                     | NA                  | NA                                                                                                                              | NA                                          | NA                                                                       | RP                    |
| 22        | F   | 2            | Constriction of the visual field | NA                       | Reduced visual field, night blindness, decreased visual acuity                     | NA                  | NA                                                                                                                              | NA                                          | NA                                                                       | RP                    |
| 23        | M   | 6            | Hemeralopy                       | 28                       | Night blindness, decreased visual acuity, reduced visual field                     | 0.3/0.4             | Bone spicule pigmentation,                                                                                                      | Abolished                                   | Cataract, suspected Meniere's disease                                    | RP                    |
| 24        | M   | 3            | Hemeralopy                       | 6                        | Night blindness and reduced visual field                                           | 0.1/0.1             | Macular atrophy                                                                                                                 | NA                                          | NA                                                                       | LCA                   |
| 27        | F   | 5 months     | Unknown                          | NA                       | Intense photophobia (better scotopic vision)                                       | NA                  | NA                                                                                                                              | NA                                          | NA                                                                       | LCA                   |
| 29        | M   | 2            | Hemeralopy                       | 11                       | Night blindness, decreased visual acuity, reduced visual field                     | 0.7/0.7             | NA                                                                                                                              | Abolished                                   | NA                                                                       | RP                    |
| 33        | M   | NA           | Unknown                          | NA                       | NA                                                                                 | NA                  | NA                                                                                                                              | NA                                          | NA                                                                       | LCA                   |
| 35        | M   | 50           | Hemeralopy                       | 52                       | NA                                                                                 | 0.5/0.7             | RPE changes in the periphery, peripapillary atrophy, salt and peeper fundus.                                                    | Decreased responses                         | NA                                                                       | RP                    |
| 36        | F   | NA           | Unknown                          | NA                       | NA                                                                                 | NA                  | NA                                                                                                                              | NA                                          | NA                                                                       | RP                    |
| 37        | F   | 4            | Constriction of the visual field | 7                        | Reduced visual field, night blindness, decreased visual acuity                     | 0.1/0.1             | Pigment deposits in macula, bone-spicule pigmentation in the equatorial retina                                                  |                                             | Nystagmus, strabismus                                                    | LCA                   |
| 39        | M   | 23           | Hemeralopy                       | 24                       | Concentric reduction of the visual field, night blindness, decreased visual acuity | 0.8/0.8             | Salt and pepper retinopathy, RPE changes in the periphery, normal optic disc and blood vessels                                  | NA                                          | NA                                                                       | RP                    |
| 42        | M   | 25           | Hemeralopy                       | 29                       | Reduced visual field (10° central), night blindness, decreased visual acuity       | 0.5/0.5             | Bone spicule pigmentation, pallor of the optic disc, narrowed vessels                                                           | NA                                          | NA                                                                       | RP                    |
| 44        | F   | First decade | Constriction of the visual field | NA                       | NA                                                                                 | NA                  | NA                                                                                                                              | NA                                          | NA                                                                       | RP                    |
| 45        | M   | NA           | Hemeralopy                       | NA                       | NA                                                                                 | 0.32/0.25           | Bone spicule pigmentation, narrowed vessels and pale optic discs                                                                | NA                                          | Cataracts                                                                | RP                    |
| 46        | F   | 13           | Hemeralopy                       | NA                       | Night blindness, reduced visual field                                              | NA                  | Bone spicule pigmentation, narrowed vessels                                                                                     | Abolished                                   | Photophobia                                                              | RP                    |
| 48        | M   | Birth        | Unknown                          | NA                       | NA                                                                                 | NA                  | NA                                                                                                                              | NA                                          | Nystagmus, obesity                                                       | RP                    |
| 49        | F   | Birth        | Hemeralopy                       | 11                       | Night blindness, reduced visual field                                              | 0.6/0.2             | Bone spicule pigmentation (mild)                                                                                                | Decreased amplitudes                        | NA                                                                       | RP                    |
| 50        | F   | 20           | Hemeralopy                       | 29                       | Night blindness, decreased visual acuity, reduced visual field                     | 0.3/0.3             | Bone spicule pigmentation                                                                                                       | Decreased amplitudes                        | Cataracts                                                                | RP                    |
| 51        | M   | 2            | Hemeralopy                       | 5                        | Night blindness, reduced visual field                                              | 1/0.8               | Bone spicule pigmentation and pale optic discs                                                                                  | Decreased amplitudes                        | NA                                                                       | RP                    |
| 53        | F   | 24           | Decreased visual acuity          | NA                       | Night blindness, decreased visual acuity, reduced visual field                     | <0.05/<0.05         | Typical of advanced RP with macular affection                                                                                   | NA                                          | Photophobia                                                              | CRD                   |
| 55        | M   | Birth        | Hemeralopy                       | NA                       | Total blindness                                                                    | No light perception | Retinal dystrophy, bone spicule pigmentation                                                                                    | NA                                          | NA                                                                       | RP                    |
| 56        | F   | 37           | Hemeralopy                       | 44                       | Reduced visual field, night blindness, decreased visual acuity                     | 0.6/0.5             | RPE changes in the periphery, perifoveal atrophy, bone-spicule pigmentation in the equatorial retina, pallor of the optic discs | Abolished. Delayed visual evoked potentials | NA                                                                       | RP                    |
| 59        | M   | Birth        | Hemeralopy                       | 16                       | Night blindness, decreased visual acuity, reduced visual field                     | 0.3/0.2             | Bone spicule pigmentation, narrowed vessels and pale optic discs                                                                | Abolished                                   | Myopia                                                                   | RP                    |
| 60        | M   | 18           | Constriction of the visual field | NA                       | Night blindness, decreased visual acuity, reduced visual field                     | 0.7/0.6             | Optic disc pallor                                                                                                               | NA                                          | Cataracts, photophobia, hearing loss (supposedly after an ear infection) | USHER                 |
| 61        | F   | NA           | Unknown                          | NA                       | NA                                                                                 | NA                  | NA                                                                                                                              | NA                                          | NA                                                                       | LCA                   |
| 65        | F   | 1.5          | Hemeralopy                       | 2.5                      | Night blindness, decreased visual acuity, reduced visual field                     | NA                  | Tapetoretinal degeneration                                                                                                      | NA                                          | Strabismus, hypermetropia, astigmatism, photophobia                      | xICRD                 |

| ID Number | Sex | Age of onset | First visual symptom                      | Age at time of diagnosis | Symptoms                                                                                                      | BCVA    | Fundus                                                                                                                                                      | ERG                  | Additional findings                                         | Clinical reassessment             |
|-----------|-----|--------------|-------------------------------------------|--------------------------|---------------------------------------------------------------------------------------------------------------|---------|-------------------------------------------------------------------------------------------------------------------------------------------------------------|----------------------|-------------------------------------------------------------|-----------------------------------|
| 66        | F   | 22           | Hemeralopy                                | NA                       | Concentric reduction of the visual field (20° central), night blindness, decreased visual acuity, photophobia | 0.8/0.8 | Bone spicule pigmentation, pallor of the optic disc, narrowed vessels                                                                                       | NA                   | NA                                                          | RP                                |
| 68        | F   | 33           | Hemeralopy                                | 37                       | Night blindness                                                                                               | 1/1     | Bone spicule deposits predominant in the superior part of the retina resembling sector RP (inferior temporal sector free), narrowed vessels, normal macula. | NA                   | NA                                                          | RP (sector)                       |
| 69        | M   | First decade | Hemeralopy                                | NA                       | Concentric reduction of the visual field (5° central), night blindness, decreased visual acuity               | 0.4/0.4 | Bone spicule pigmentation, narrowed vessels and pale optic discs                                                                                            | NA                   | Post-traumatic hearing loss                                 | RP                                |
| 70        | F   | NA           | Constriction of the visual field          | 24                       | Reduced visual field and visual acuity, night blindness                                                       | NA      | Bone spicule pigmentation, narrowed vessels and pale optic discs                                                                                            | NA                   | NA                                                          | RP                                |
| 71        | F   | 34           | Hemeralopy                                | 43                       | Reduced visual field, night blindness, decreased visual acuity, photophobia                                   | 0.1/0.1 | RP sine pigmento, narrowed vessels                                                                                                                          | Decreased amplitudes | NA                                                          | RP                                |
| 73        | M   | First decade | Hemeralopy                                | NA                       | Concentric reduction of the visual field, night blindness, decreased visual acuity                            | 0.7/0.8 | Increase of the brightness of internal limiting membrane. Bone spicule pigmentation outside the vascular arcade                                             | Abolished            | NA                                                          | RP                                |
| 74        | M   | First decade | Hemeralopy                                | NA                       | Reduced visual field, night blindness, decreased visual acuity                                                | NA      | NA                                                                                                                                                          | NA                   | NA                                                          | RP                                |
| 76        | F   | NA           | Hemeralopy                                | NA                       | Concentric reduction of the visual field (8° central); Preserved visual acuity                                | NA      | NA                                                                                                                                                          | NA                   | NA                                                          | RP                                |
| 78        | F   | NA           | Unknown                                   | 32                       | Night blindness, decreased visual acuity, reduced visual field                                                | NA      | NA                                                                                                                                                          | NA                   | Myopia                                                      | RP                                |
| 79        | M   | 40           | Hemeralopy                                | NA                       | Night blindness, decreased visual acuity, reduced visual field                                                | NA      | NA                                                                                                                                                          | NA                   | Myopia, photophobia                                         | RP                                |
| 81        | F   | First decade | Hemeralopy                                | 18                       | Night blindness, decreased visual acuity, reduced visual field                                                | 0.5/0.5 | Bone spicule pigmentation, narrowed vessels and pale optic discs.                                                                                           | NA                   | NA                                                          | RP                                |
| 83        | M   | First decade | Hemeralopy                                | NA                       | Night blindness, decreased visual acuity, reduced visual field                                                | 0.5/0.3 | Tigroid fundus                                                                                                                                              | NA                   | NA                                                          | RP                                |
| 84        | F   | 2            | Hemeralopy                                | 24                       | Night blindness, decreased visual acuity, reduced visual field                                                | NA      | NA                                                                                                                                                          | Abolished            | Myopia, astigmatism                                         | RP                                |
| 85        | M   | 12           | Hemeralopy                                | 40                       | Night blindness, decreased visual acuity, reduced visual field                                                | NA      | NA                                                                                                                                                          | NA                   | NA                                                          | RP                                |
| 87        | M   | 40           | Hemeralopy                                | 43                       | Night blindness, decreased visual acuity, reduced visual field                                                | 0.3/0.2 | Bone spicule pigmentation, narrowed vessels and pale optic discs and macular atrophy                                                                        | NA                   | Farnsworth Test: discromatops/ hearing loss at 49 years old | RP                                |
| 91        | F   | 32           | Hemeralopy/ reduction of the visual field | 36                       | Reduced visual field, night blindness                                                                         | NA      | Narrowed vessels, fundus albipunctatus, normal optic discs, drusen near the fovea                                                                           | Abolished            | Myopia, astigmatism, slow progression, cataract             | Maculopathy                       |
| 93        | M   | First decade | Constriction of the visual field          | 8                        | Night blindness, reduced visual field, photophobia, decreased visual acuity                                   | NA      | Bone spicule pigmentation, narrowed vessels and pale optic discs                                                                                            | NA                   | NA                                                          | LCA                               |
| 94        | M   | 11           | Hemeralopy                                | 12                       | Night blindness, constriction of the visual field, decreased visual acuity                                    | NA      | RPE atrophy                                                                                                                                                 | Abolished            | Myopia magna                                                | Choroideremia                     |
| 95        | F   | 1            | Constriction of the visual field          | First decade             | Night blindness, decreased visual acuity, reduced visual field                                                | 0.2/0.1 | Bilateral macular atrophy                                                                                                                                   | NA                   | Strabismus since 9 months of age, nystagmus                 | LCA                               |
| 97        | F   | 13           | Decreased visual acuity                   | 29                       | Night blindness, reduced visual field, photophobia, decreased visual acuity                                   | NA      | Pallor of the optic discs, narrowed vessels, bone spicules in the periphery, peripapillary atrophy with relatively preserved macula                         | NA                   | Nystagmus                                                   | RP with early macular involvement |
| 100       | F   | 25           | Unknown                                   | NA                       | NA                                                                                                            | NA      | NA                                                                                                                                                          | Abolished            | NA                                                          | RP                                |
| 101       | M   | 7            | Constriction of the visual field          | NA                       | Night blindness, reduced visual field, decreased visual acuity                                                | NA      | NA                                                                                                                                                          | NA                   | Cephalaea                                                   | RP                                |
| 102       | F   | 8            | Constriction of the visual field          | 29                       | Night blindness, decreased visual acuity, reduced visual field                                                | NA      | NA                                                                                                                                                          | NA                   | NA                                                          | RP                                |
| 103       | F   | 11           | Decreased visual acuity                   | 27                       | Night blindness, decreased visual acuity, reduced visual field                                                | NA      | NA                                                                                                                                                          | NA                   | Photophobia, myopia, astigmatism                            | CRD                               |
| 104       | F   | 17           | Hemeralopy                                | 21                       | Night blindness, reduced visual field                                                                         | NA      | NA                                                                                                                                                          | NA                   | Astigmatism                                                 | RP                                |
| 107       | M   | 25           | Hemeralopy                                | 25                       | Night blindness, decreased visual acuity, reduced visual field                                                | NA      | NA                                                                                                                                                          | NA                   | Photophobia                                                 | RP                                |
| 108       | M   | 25           | Hemeralopy                                | 39                       | Night blindness, decreased visual acuity, reduced visual field                                                | NA      | NA                                                                                                                                                          | NA                   | Cataracts                                                   | RP                                |
| 112       | M   | 17           | Decreased visual acuity                   | NA                       | Night blindness, decreased visual acuity, reduced visual field                                                | NA      | NA                                                                                                                                                          | NA                   | NA                                                          | RP                                |
| 114       | F   | 19           | Decreased visual acuity                   | 50                       | Night blindness, decreased visual acuity, reduced visual field                                                | 0.6/0.5 | NA                                                                                                                                                          | NA                   | NA                                                          | CRD                               |
| 115       | F   | 17           | Hemeralopy                                | 23                       | Night blindness, decreased visual acuity, reduced visual field                                                | NA      | NA                                                                                                                                                          | NA                   | Hearing loss                                                | USHER                             |

| ID Number | Sex | Age of onset | First visual symptom                | Age at time of diagnosis | Symptoms                                                                                | BCVA | Fundus                                                                                                                                                                                             | ERG | Additional findings   | Clinical reassessment |
|-----------|-----|--------------|-------------------------------------|--------------------------|-----------------------------------------------------------------------------------------|------|----------------------------------------------------------------------------------------------------------------------------------------------------------------------------------------------------|-----|-----------------------|-----------------------|
| 119       | M   | 20           | Constriction of the visual field    | 25                       | Reduced visual field, photophobia                                                       | NA   | NA                                                                                                                                                                                                 | NA  | NA                    | RP                    |
| 122       | M   | NA           | Unknown                             | NA                       | NA                                                                                      | NA   | NA                                                                                                                                                                                                 | NA  | NA                    | STGD                  |
| 116       | F   | 14           | Hemeralopy/ Decreased visual acuity | NA                       | Night blindness, reduced visual field, decreased visual acuity, color vision alteration | NA   | Atypical fundus. Pigment deposits within temporal superior vascular arcade, yellowish waxy optic disc, inferior macular drusen, posterior pole chorioretinal atrophy, discrete pigmentary deposits | NA  | Strabismus, cataracts | Choroideremia         |

**Manuscript # SREP-16-24192: Unravelling the genetic basis of simplex Retinitis Pigmentosa cases**

Nereida Bravo-Gil, María González-del Pozo, Marta Martín-Sánchez, Cristina Méndez-Vidal, Enrique Rodríguez-de la Rúa, Salud Borrego and Guillermo Antifolero.

**Supplementary Table S2: Unsolved cases carrying one likely pathogenic allele.** Allele frequency data derived from ExAC (The Exome Aggregation Consortium). ESCS: Enhanced S-cone Syndrome; FFM: Fundus flavimaculatus; LCA: Leber Congenital Amaurosis; RP: Retinitis pigmentosa; STGD: Stargardt disease; VUS: Variant of unknown significance.

| ID Number | Phenotype                         | Gene           | Exon  | cDNA                    | Protein           | Status | Reference                                         | Allele frequency | Interpretation                          |
|-----------|-----------------------------------|----------------|-------|-------------------------|-------------------|--------|---------------------------------------------------|------------------|-----------------------------------------|
| 113       | RP                                | <i>ABCA4</i>   | 42    | c.5882G>A               | p.G1961E          | Het    | Cella et al., Exp Eye Res (2009), rs1800553       | 0.005054         | Pathogenic STGD                         |
| 89        | RP with early macular involvement | <i>ABCA4</i>   | 43    | c.5908C>T               | p.L1970F          | Het    | Rozet et al., Eur J Hum Genet. (1998), rs28938473 | 0.002925         | Pathogenic Late-onset FFM               |
| 90        | RP with early macular involvement | <i>ABCA4</i>   | 45    | c.6148G>C               | p.V2050L          | Het    | Allikmets et al., Nat Genet (1997), rs41292677    | 0.002752         | Pathogenic  unknown                     |
| 98        | RP                                | <i>ABCA4</i>   | 45    | c.6148G>C               | p.V2050L          | Het    | Allikmets et al., Nat Genet (1997), rs41292677    | 0.002752         | Pathogenic  unknown                     |
| 64        | RP                                | <i>ABCA4</i>   | 46    | c.6148G>C               | p.V2050L          | Het    | Allikmets et al., Nat Genet (1997), rs41292677    | 0.002752         | Pathogenic  unknown                     |
| 43        | RP                                | <i>GPR98</i>   | 39    | c.8779G>A               | p.V2927I          | Het    | This study, rs547397177                           | 6.63E-05         | VUS                                     |
| 96        | Non syndromic RP                  | <i>BBS12</i>   | 2     | c.1114_1115del          | p.F372fs          | Het    | This study                                        | 5.78E-05         | Likely pathogenic                       |
| 110       | LCA                               | <i>CEP290</i>  | 25    | c.2691A>G               | p.I897M           | Het    | This study                                        | 2.11E-05         | Likely pathogenic                       |
| 28        | RP                                | <i>CEP290</i>  | 30    | c.3517C>A               | p.Q1173K          | Het    | This study                                        | 3.78E-05         | Likely pathogenic                       |
| 26        | RP                                | <i>CNGB3</i>   | 14    | c.1627G>A               | p.V543I           | Het    | This study                                        | 1.66E-05         | Likely pathogenic                       |
| 57        | RP                                | <i>EYS</i>     | 15-19 | Deletion exons 15-19    | Unable to predict | Het    | Abd-El Aziz et al. (2008)                         | -                | Pathogenic                              |
| 19        | RP                                | <i>EYS</i>     | 32-33 | Deletion exons 32-33    | Unable to predict | Het    | Audo et al., Hum Mutat (2010)                     | -                | Pathogenic                              |
| 25        | RP                                | <i>GPR98</i>   | 59    | c.12208G>A              | p.V4070I          | Het    | This study, rs200943280                           | 9.19E-05         | VUS                                     |
| 109       | RP with early macular involvement | <i>NR2E3</i>   | 6     | c.932G>A                | p.R311Q           | Het    | Haider et al., Nat Genet. (2000), rs28937873      | 0.0003416        | Pathogenic ESCS  Goldmann-fave syndrome |
| 99        | LCA                               | <i>PCDH15</i>  | 35    | c.5296_5304dupGCTCCTCCT | p.A1766_P1768dup  | Het    | This study, rs397517466                           | 0.000148         | VUS                                     |
| 5         | RP                                | <i>RP1</i>     | 4     | c.6196_6198del          | p.D2066del        | Het    | This study                                        | -                | Likely pathogenic                       |
| 105       | RP                                | <i>RPGRIP1</i> | 10    | c.1220dupA              | p.Q408fs          | Het    | This study                                        | -                | Likely pathogenic                       |
| 82        | RP                                | <i>USH2A</i>   | 27    | c.5363A>G               | p.D1788G          | Het    | This study                                        | 8.24E-06         | Likely pathogenic                       |
